# Supplementary material for: Tcf7l1 directly regulates cardiomyocyte differentiation in embryonic stem cells
Source: PubMed Central journal article supplement (PMC6190650; doi:10.1186/s13287-018-1015-x), 2018-10-11
Supplement: 13287_2018_1015_MOESM1_ESM.pdf [file 13287_2018_1015_MOESM1_ESM.pdf]

## Supplemental Information

### Materials and Methods

#### Cell Culture

Tcf7l1<sup>+/+</sup> and Tcf7l1<sup>-/-</sup> ESC lines were provided by Dr. Bradley J. Merrill (University of Illinois at Chicago). ESCs were propagated in 0.1% gelatin-coated dishes and cultured with feeder-free ESC medium [DMEM (Gibco) supplemented with 15% FBS (Atlanta Biologicals), 100 U/ml penicillin G, 100 µg/ml streptomycin sulfate, 2 mM L-glutamine, 0.1 mM β-mercaptoethanol, 1 × 10<sup>3</sup> U/ml murine leukemia inhibitory factor (LIF, Global Stem)]. Medium was changed daily. To induce EB formation and differentiation, the ESCs were grown as 20 µl hanging droplets (2 × 10<sup>4</sup> cells/ml) in SFDM without LIF [1]. EBs were collected as indicated and the medium was replaced every two days.

293FT cells were cultured in DMEM (Gibco) supplemented with 20% FBS (Atlanta Biologicals), 100 U/ml penicillin G, 100 µg/ml streptomycin sulfate, and 2 mM L-glutamine.

#### Construction of the Inducible Expression Vector, Preparation of Lentiviral Vectors, and Selection of Stable Expression Clones

We used Tet-On advanced lentiviral vector system (Clontech) and Tet-Off advanced lentiviral vector system (Clontech) for inducible gene expression. Tcf7l1 and Tcf7l1dN (N-ter 73 amino acid deletion) genes were amplified by PCR from Homo sapiens transcription factor 7-like 1 cDNA clone (OriGene Technologies) using Pfx DNA Polymerase (Invitrogen). Tcf7l1-VP16 was prepared by fusing aa 314-471 of Tcf7l1 to the VP16 activation domain. Tcf7l1-En was prepared by fusing aa 314-471 of Tcf7l1 to the repressor domain of Engrailed 1.

To prepare lentiviral infectious particles, the plasmids were cotransfected with packaging plasmid psPAX2 and envelope plasmid pMD2.G at a ratio of 3:2:1 into 293FT cells using FuGENE HD transfection reagent (Promega). The culture supernatant was collected 48h and 72h after transfection. Tcf7l1<sup>-/-</sup> cells were first infected by pLVX-Tet-On Advanced lentivirus or pLVX-Tet-Off Advanced lentivirus and were selected for G418 (200 µg/ml) resistance. The resulted G418-resistant cells were next infected with pLVX-Tcf7l1, pLVX-Tcf7l1dN, pLVX-Tcf7l1-EN or pLVX-Tcf7l1-Vp16 lentiviruses and were selected with puromycin (1 µg/ml) to generate stable cell lines.

#### Realtime quantitative RT-PCR

Total RNA was extracted using TRIzol reagent (Invitrogen). Total RNA (100 ng) was subjected to quantitative RT-PCR using Taqman One-Step RT-PCR Master Mix reagent (Eurogentec) and 7900 HT Fast-Real-Time PCR System (Applied Biosystems). Copy number for each transcript is calculated relative to that of GAPDH. Sequences of primers and probes are as the following:

| Gene | Forward primer             | Probe                 | Reverse primer        |
|------|----------------------------|-----------------------|-----------------------|
| Oct4 | CACGAGTGGAAAGCAACTCA<br>GA | CTCTGAGCCCTGTGCCGACCG | TCTCCAACCTTCACGGCATTG |

|              |                               |                                 |                             |
|--------------|-------------------------------|---------------------------------|-----------------------------|
| Sox2         | TGGACAGCTACGCGCAC             | CTGCCGTTGCTCCAGCCGTT            | GCTGCTCCTGCATCATGCT         |
| Eomes        | GCCGTCTGCGATTCGCT             | AGCATGCAGTTGGGAGAGCA            | GGGACAGTTCACCGAGCT          |
| T            | AACCACCGGTCATCGCC             | TACCCAGCCCCTATGCTCATCGG         | TCCGCATAGGTTGGAGAGCT        |
| Gsc          | CTGGCCAGGAAGGTGCAC            | TTCGGGAGGAGAAGGTGGAGGTCTG       | CTTGGCTCGGCGGTTCTTA         |
| Mesp1        | GGCACCTTCGGAGGGAGTAG          | TCCTGGAAGAGGCGGCAGTGATACC       | CCCGGGATGCCATGT             |
| Sox17        | TCGGTCTGGAGAGCCATGAG          | TACGCCAGTGACGACCAGAGCCAGC       | CCACCACCTCGCCTTTTAC         |
| Notch3       | CTGGGAATGAAGAACATG            | CATTCAAGTCTGTGACCACCTCC         | CTACCTTCAGTCTCTTGG          |
| Pax6         | GACTGCCAGCTTCCATCCAC          | CCTCGCCTCCAGCCTCAGCCG           | AACACACCAACTTTCGCAAGATAG    |
| Nestin       | GCTTGAAAGACTGGTAGAGA<br>AAGAG | CTCCAGAAGAAGACCAGCAGGCGTT       | CACCTGGTCCTCTGCTTCTTC       |
| Tbx5         | CAGGCTGCCTTCACCCAG            | AGGGCATGGAAGGAATCAAGGTGTT<br>CT | CAGCCACAGTTCACGTTTCATG      |
| Nkx2-5       | CCTCGGGCGGATAAAAAAGA          | CGCGCTGCAGAAGGCAGTGG            | GCCATCCGTCTCGGCTT           |
| $\alpha$ MHC | GAATGACGGACGCCAGATG           | TTGTCATCAGGCACGAAGCACTCCG       | ACGACCTTGGCCTTAACATAC<br>TC |
| Gapdh        | ACTGGCATGGCCTTCCG             | TTCTACCCCAATGTGTCGTCGT          | CAGGCGGCACGTCAGATC          |

## Western Blots

Cells were lysed in RIPA buffer [50 mM Tris-HCl (pH 8.0), 150 mM NaCl, 1% NP-40, 0.5% sodium deoxycholate, 0.1% SDS], and the proteins were separated on a 4-12% Bis-Tris gel (Life Technologies) and transferred onto nitrocellulose membranes. The membranes were incubated with the following primary antibodies at 4°C overnight: goat monoclonal antibody to Tcf711 (1:2,000; Santa Cruz Biotech sc-8635), rabbit monoclonal antibody to engrailed (1:1,000; Santa Cruz Biotech sc-28640), mouse monoclonal antibody to VP16 (1:1,000; Santa Cruz Biotech sc-7545) and goat monoclonal antibody to HRP-conjugated  $\beta$ -actin (1:2,000; Santa Cruz Biotech). The membranes were next incubated with horseradish peroxidase-conjugated secondary antibodies to the appropriate IgG (1:2,000; Life Technologies) for 90 min. Bound antibodies were visualized with enhanced chemiluminescence reagents (Amersham Biosciences).

## Immunostaining

Cells were fixed with 4% paraformaldehyde for 10 min, followed by 0.1% Triton X-100 in PBS for 30 min at room temperature. The samples were then blocked with 10% normal goat serum in 0.1% Triton X-100/PBS for 30 min at 37°C. Primary mouse monoclonal antibody to  $\alpha$ -Actinin (1:100; Novus Biologicals) were incubated at 4°C overnight. Secondary antibody Alexa Fluor 594 goat anti-mouse IgG (H+L) antibody (1:500; Life Technologies) was added and incubated at room temperature for 1h. The samples were next incubated with DAPI for 5 min. Images were captured with a Nikon Fluorescence microscope.

## Luciferase Reporter Assay

Construction of Mesp1-Luc was previously described [2]. Different doses of pCMV6-XL5-Tcf711 (0.5 µg, 1 µg and 2 µg), 1 µg Mesp1-Luc reporter, and 0.05 µg internal control plasmid pRL-CMV were transfected into 293FT cells using FuGENE HD transfection reagent (Promega). The cells were lysed in passive lysis buffer (Promega) 24h post-transfection. The assay was performed using the Dual-Luciferase Reporter Assay System (Promega). The luciferase activity was read in a Turner Biosystems 20/20 Luminometer.

## Chromatin Immunoprecipitation (ChIP) Assay

E14 ESCs and Tcf711 tet-on (in Tcf711<sup>-/-</sup>) ESCs went differentiated for 8 days. For Tcf711 teton ESCs, doxycycline was added on day 0 of differentiation. Differentiated cells were crosslinked with 1% formaldehyde for 15 min at room temperature and this cross-linking reaction was inactivated by the addition of glycine to a final concentration of 125 mM, which was followed by a 10 mins incubation at room temperature. Cells were washed twice with ice-cold PBS and harvested using a scraper. The cells were next centrifuged at 3500 rpm for 5 mins at 4°C, and the pellet was snap-frozen in liquid nitrogen and stored at -80°C until the day of use. Cell pellets were resuspended in cell lysis buffer containing protease inhibitors (5 mM PIPES pH 8.0, 85 mM KCl, 0.5% NP-40), incubate on ice for 15 mins and centrifuged at 4°C for 5 mins at 5000 rpm. The cell pellet was resuspended in nuclear lysis buffer containing protease inhibitors (50 mM Tris pH 8.0, 10 mM EDTA, 1% SDS), and incubated for 15 mins on ice. Sonication was performed using Diagenode Bioruptor Plus for 10 times on 30-second on and 30-second off pulses. Samples were kept on ice at all times. The cell lysate was centrifuged at 14000 rpm for 15 mins at 4 °C and the supernatant transferred to a fresh tube. The supernatant was diluted in lysis buffer (150 mM NaCl, 25 mM Tris pH8.0, 5 mM EDTA, 1% Triton-X 100, 0.5% Deoxycholate) to bring down the amount of SDS to 0.125%. The diluted lysate was precleared with IgG for 1 h and then Protein A agarose for another 1 h at 4 °C. After a brief centrifugation, the supernatant was transferred to a fresh tube and incubated with the primary antibody overnight at 4 °C. 40 µL protein A agarose bead was added and incubated for another 1 h at 4 °C on the next day. After several washes: 3 times with RIPA buffer (150 mM NaCl, 50 mM Tris pH 8.0, 1 mM EDTA, 1% NP40, 0.1% SDS, 0.5% Deoxycholate), 1 time with high salt buffer (500 mM NaCl, 50 mM Tris pH 8.0, 1 mM EDTA, 1% NP40, 0.1% SDS, 0.5% Deoxycholate), 1 time with LiCl-wash buffer (250 mM LiCl, 50 mM Tris pH8.0, 1 mM EDTA, 1% NP40, 0.5% Deoxycholate) and 2 times with TE buffer, bound complexes were eluted by heating at 65 °C with occasional vortex, and crosslinks were reversed by incubation at 65 °C overnight. Eluted protein-DNA complexes were treated with RNase A and Proteinase K sequentially. Following phenol-chloroform extraction and ethanol precipitation, DNA was dissolved in H<sub>2</sub>O.

The following PCR primers were used to amplify regulatory regions of indicated cardiac genes: Mesp1 Forward, GGCACCTTCGGAGGGAGTAG, Mesp1 Reverse, CCCGGGATGCCCATGT; Mef2c Forward, TCCACTCCCCATTGGACT, Mef2c Reverse, TGCGCTTGACTGAAGGACTTT; αMHC Forward, GAATGACGGACGCCAGATG, αMHC Reverse, ACGACCTTGGCCTTAACATACTC; Gata4 Forward, TTAGCCAGTTCTTGCGTGT, Gata4 Reverse, CGGACCGGCTTGTCTTTAGT.

1. Liu Y, Chen L, Diaz AD et al. Mesp1 Marked Cardiac Progenitor Cells Repair Infarcted Mouse Hearts. **Scientific reports**. 2016;6:31457.
2. Li Y, Yu W, Cooney AJ et al. Brief report: Oct4 and canonical Wnt signaling regulate the cardiac lineage factor Mesp1 through a Tcf/Lef-Oct4 composite element. **Stem Cells**. 2013;31:1213-1217.
