# Supplementary material for: Tcf7l1 directly regulates cardiomyocyte differentiation in embryonic stem cells
Source: PubMed Central journal article supplement (PMC6190650; doi:10.1186/s13287-018-1015-x), 2018-10-11
Supplement: 13287_2018_1015_MOESM3_ESM.pdf [file 13287_2018_1015_MOESM3_ESM.pdf]

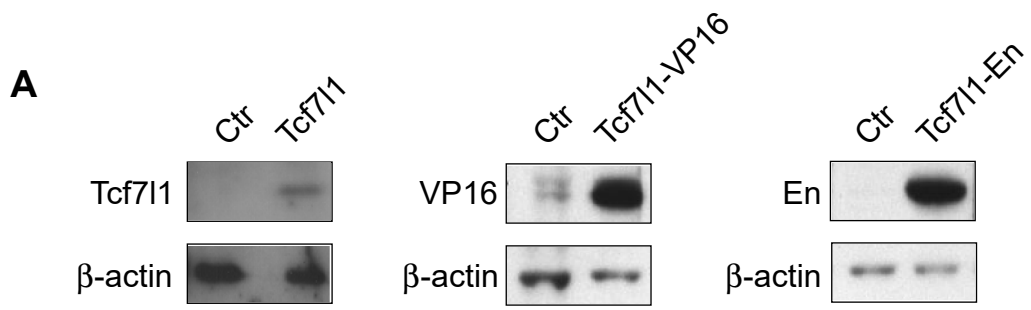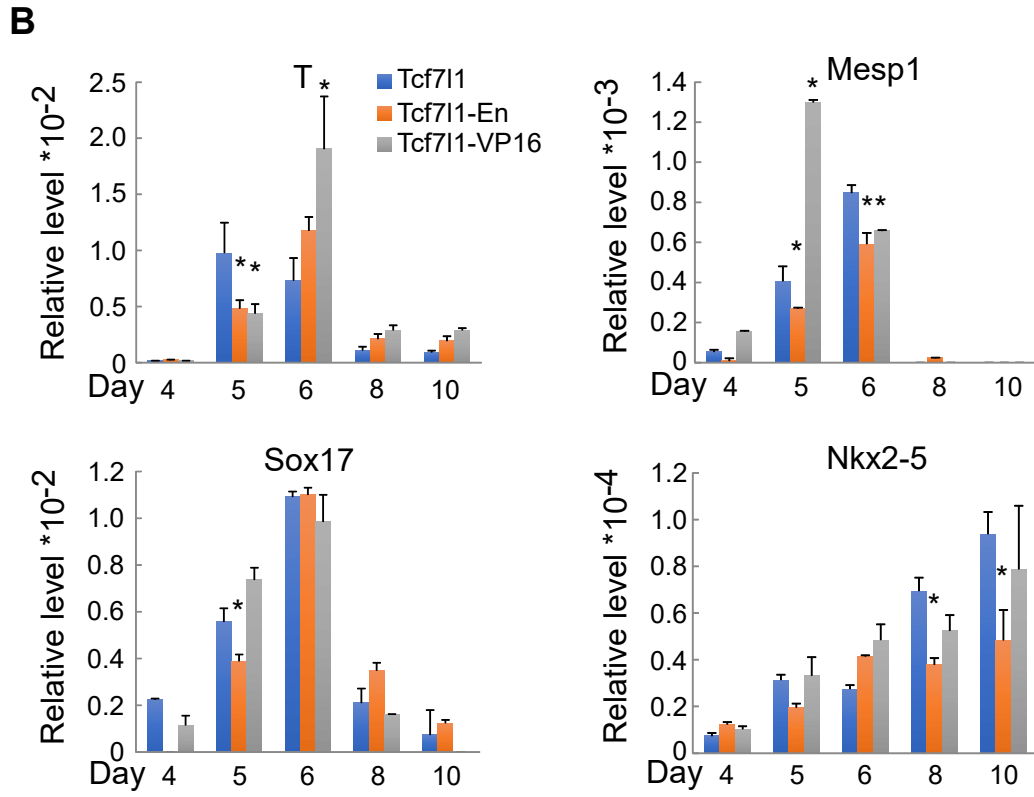

supplemental FigS2.
